# Supplementary material for: Calcineurin Inhibition in Deceased Organ Donors: A Systematic Review and Meta-analysis of Preclinical Studies
Source: PubMed Central journal article supplement — Transplant Direct. 2023 Aug 28;9(9):e1519. doi: 10.1097/TXD.0000000000001519 (PMC10465100; doi:10.1097/txd.0000000000001519), 2023-08-28
Supplement: txd-9-e1519-s001.pdf [file txd-9-e1519-s001.pdf]

**File S1.** Medline search strategy.

1. brain death/
2. brain dead\*.mp.
3. brain death.mp.
4. irreversible coma.mp.
5. coma depasse.mp.
6. cerebral death.mp.
7. neurological\* death.mp.
8. cerebral circulatory arrest.mp.
9. neurologically deceased.mp.
10. 1 or 2 or 3 or 4 or 5 or 6 or 7 or 8 or 9
11. Tissue Donors.mp.
12. donor selection/
13. (Tissue and Organ Procurement).mp. [mp=title, abstract, original title, name of substance word, subject heading word, floating sub-heading word, keyword heading word, organism supplementary concept word, protocol supplementary concept word, rare disease supplementary concept word, unique identifier, synonyms]
14. (Tissue and Organ Harvesting).mp. [mp=title, abstract, original title, name of substance word, subject heading word, floating sub-heading word, keyword heading word, organism supplementary concept word, protocol supplementary concept word, rare disease supplementary concept word, unique identifier, synonyms]
15. donor.mp. or donor/
16. exp donor/
17. organ donation.mp.
18. exp organ donor/
19. organprocurement.mp
20. exp transplantation/su [Surgery]
21. transplantation.mp. or transplantation/
22. organ transplantation.mp.
23. exp graft rejection/
24. Graft Rejection.mp.
25. transplant\*.mp
26. graft\*.mp.
27. exp allograft/
28. allograft.mp.
29. organ harvest\*.mp.
30. 11 or 12 or 13 or 14 or 15 or 16 or 17 or 18 or 19 or 20 or 21 or 22 or 23 or 24 or 25 or 26 or 27 or 28 or 29
- 31.kidney donation\*.mp.
32. kidney harvest\*.mp

33. liver harvest\*mp
34. kidney procurement.mp
35. liver procurement.mp
36. hear donation\*mp.
37. heart harvest\*mp
38. heart procurement
- 39.heart transplanatation
- 40.lung donation
- 41.lung harvest\*mp
- 42.lung procurement.mp
43. lung transplantation.mp
44. pancreas donation\*mp
45. pancreas harvest\*mp.
46. pancreas transplantation.mp
47. kidney transplantation.mp
48. 10 and 30
  
49. Cyclosporine.mp. or cyclosporin/ or cyclosporine/ or mycophenolic acid 2 morpholinoethyl ester/ or cyclosporin A/
50. Neoral.mp.
51. OL 27-400.mp.
52. OL 27 400.mp.
53. OL 27400.mp.
54. Sandimmun Neoral.mp.
55. Neoral, Sandimmun.mp.
56. CyA-NOF.mp.
57. CyA NOF.mp.
58. Sandimmune.mp.
59. Sandimmun.mp.
60. CsA-Neoral.mp.
61. CsA Neoral.mp.
62. CsANeoral.mp.
63. Restasis.mp.
64. 50 or 51 or 52 or 53 or 54 or 55 or 56 or 57 or 58 or 59 or 60 or 61 or 62 or
65. exp tacrolimus/
66. Tacrolimus.mp.
67. Prograf.mp.
68. Janssen Brand of Tacrolimus.mp.
69. Janssen Tacrolimus.mp.
70. Brand of Tacrolimus.mp.
71. Cilag Tacrolimus.mp.
72. Cilag Brand of Tacrolimus.mp.
73. Prograft.mp.
74. donor.mp. or donor/
75. exp donor/
76. organ donation.mp
77. exp. organ donor/

78. organ procurement.mp
79. exp transplantation/su [Surgery]
80. transplantation.mp or transplantation/
81. organ transplantation.mp.
82. exp graft rejection/
83. Graft Rejection.mp.
84. transplant\*.mp.
85. graft\*.mp.
86. exp allograft/
87. allograft.mp.
88. organ harvest\*.mp.
89. 11 or 12 or 13 or 14 or 15 or 16 or 17 or 18 or 19 or 20 or 21 or 22 or 23 or 24 or 25 or 26 or 27 or 28 or 29
90. precondition.mp.
91. pre-condition.mp.
92. exp reperfusion injury/
93. pre-conditioning.ti.
94. pre-conditioning.ab.
95. exp ischemic preconditioning/
96. 90 or 91 or 92 or 93 or 94 or 95
97. exp kidney transplantation/
98. exp liver transplantation/
99. exp heart transplantation/
100. exp lung transplantation/
101. exp pancreas transplantation/
102. 97 or 98 or 99 or 100 or 101
103. 49 or 95
104. 89 and 96
105. 81 and 97
106. Donor Preconditioning With a Calcineurin Inhibitor Improves Outcome in Rat Syngeneic Kidney Transplantation.m\_titl.
107. 105 or 1069

**Figure S2.** A, Forest plot of calcineurin inhibitors on ALT and AST. B, Forest plot of calcineurin inhibitors on graft loss.

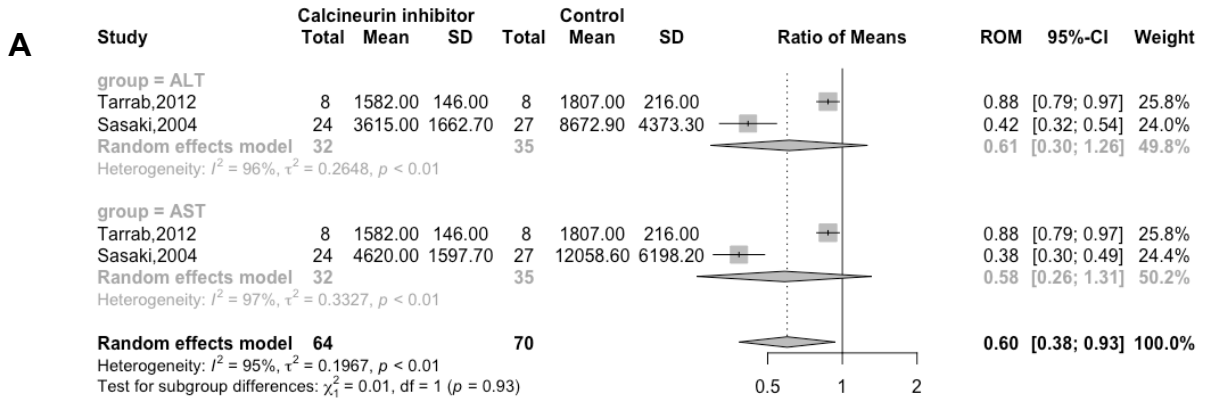

**B**

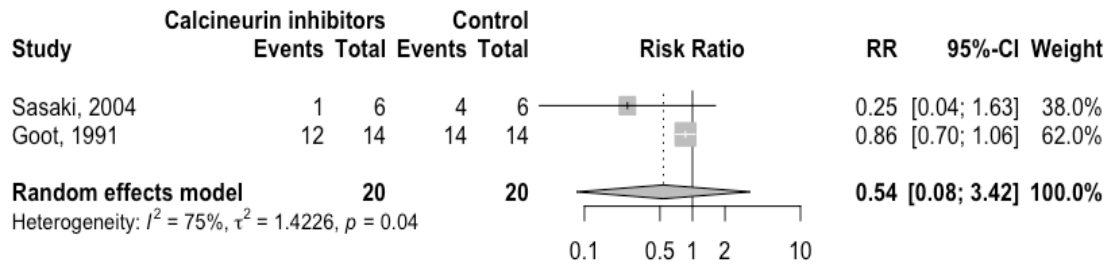

ALT, alanine aminotransferase; AST, aspartate aminotransferase; CI, confidence interval; RR, risk ratio.
